# Supplementary material
Source: Springer Nature journal article supplement (https://www.springermedizin.de/resource/supplementary/12937_2010_294_MOESM2_ESM.pdf/25654804)

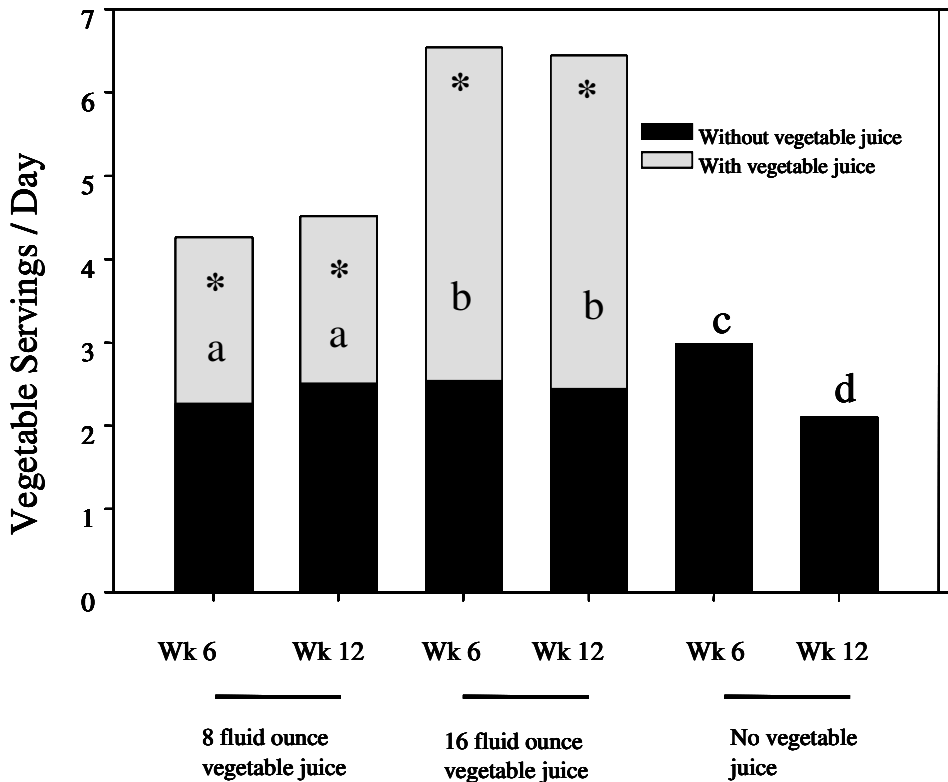

Supplement: MOESM2 [file 25654804]
